# Supplementary material
Source: Research Square preprint supplement (doi:10.21203/rs.3.rs-9354079/v1)
Supplement: Supplementary file 1 [file 0babbeb811faf1b617c89dfc.pdf]

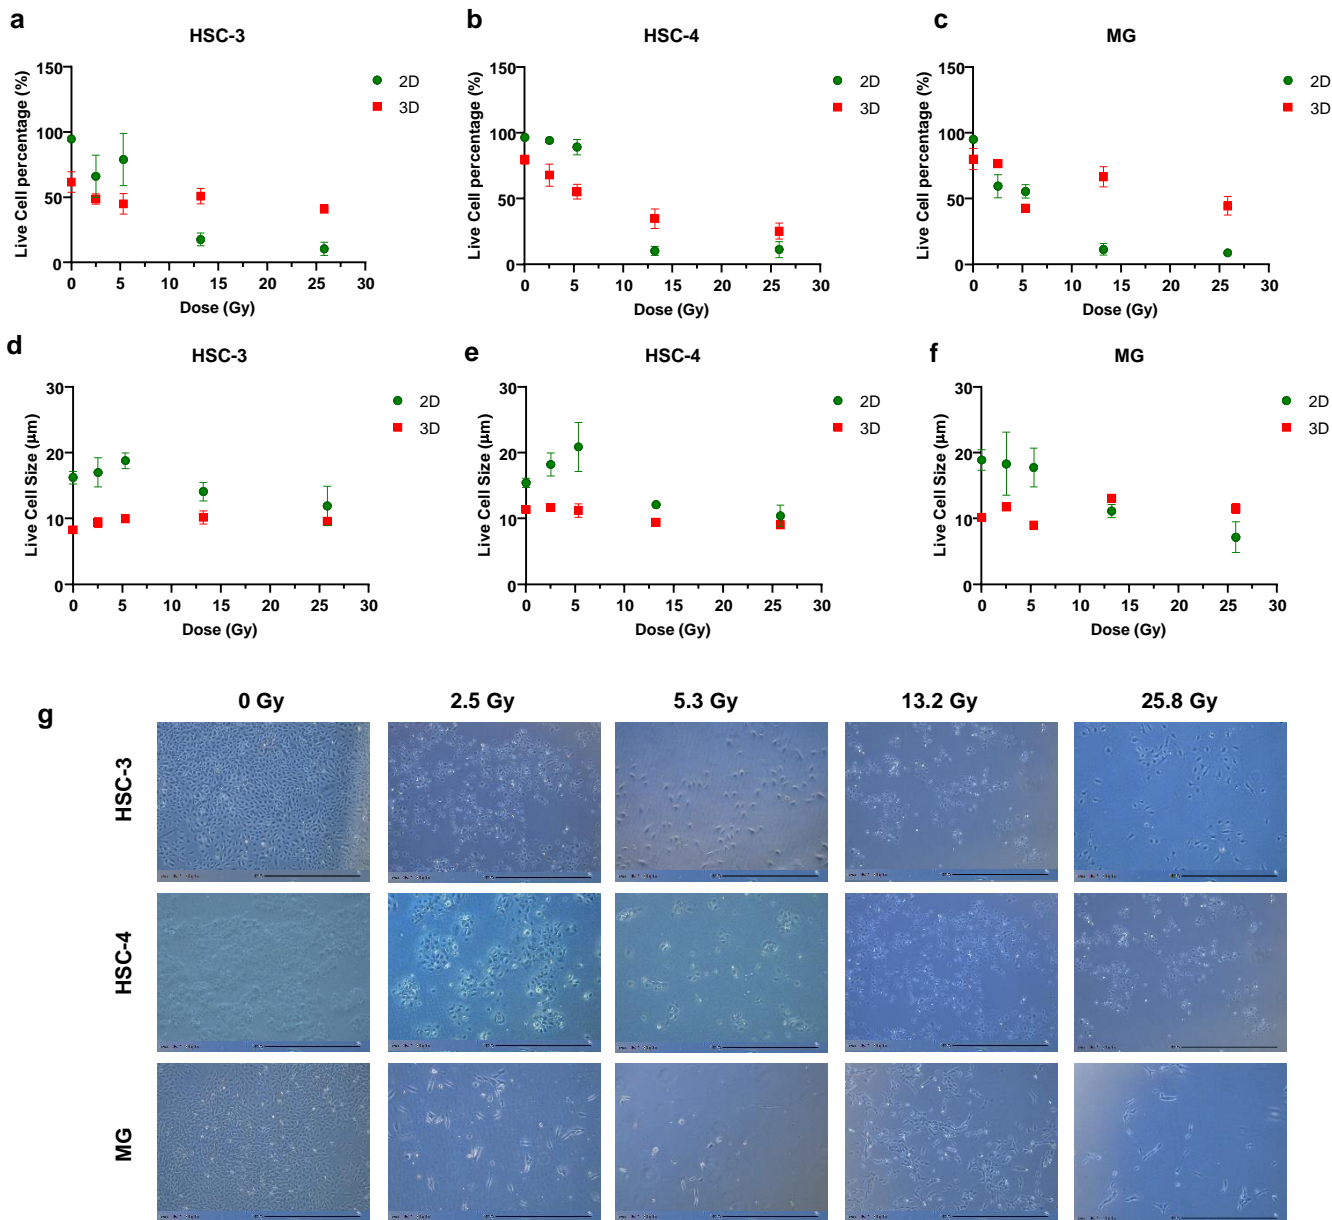

**Supplementary Figure 1. Morphological and viability characterization of cancer cell lines in 2D and 3D cultures.**

**(a–c) Live Cell Percentage.** Percentage of live cells for HSC-3 **(a)**, HSC-4 **(b)**, and MG **(c)** comparing 2D monolayer (green circles) and 3D matrix-based models (red circles). Data are expressed as percentage relative to 0 Gy controls across the dose range (0–25.8 Gy). Error bars represent mean  $\pm$ SD.

**(d–f) Live Cell Size.** Analysis of cell dimensions ( $\mu\text{m}$ ) for HSC-3 **(d)**, HSC-4 **(e)**, and MG **(f)** in 2D (green circles) and 3D cultures (red circles) following neutron irradiation. Error bars represent mean  $\pm$ SD.

**(g) 2D Representative Morphology.** Representative bright-field microscopy images of HSC3, HSC4, and MG 2D monolayers at indicated neutron doses (0, 2.5, 5.3, 13.2, and 25.8 Gy).

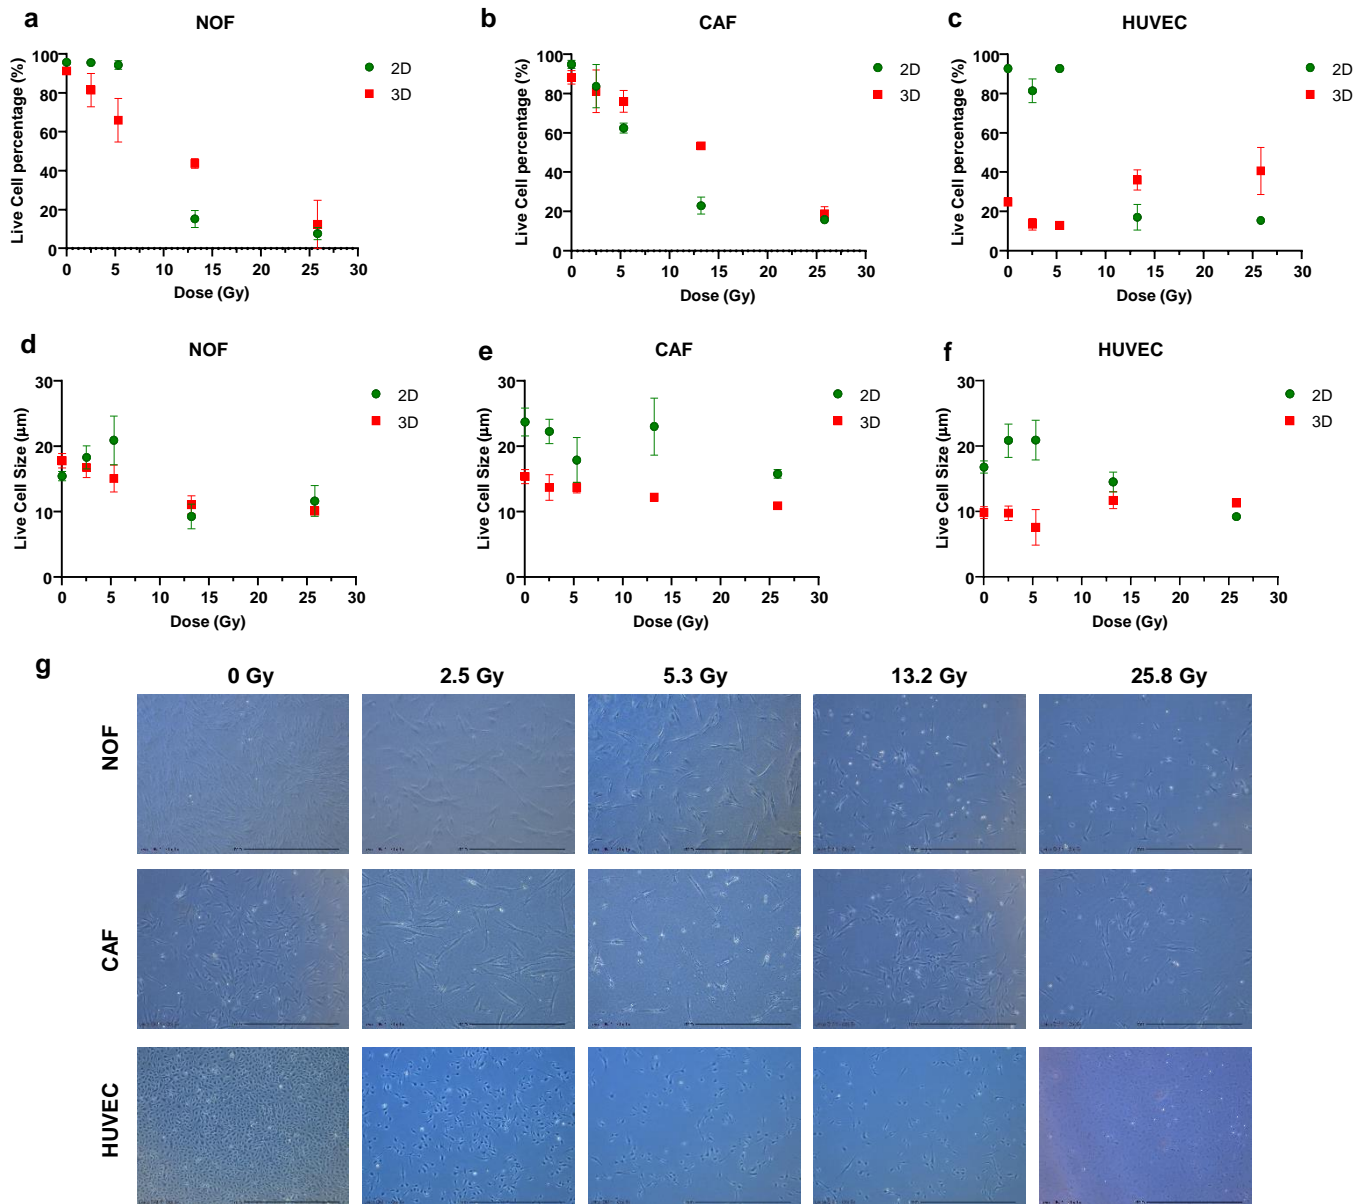

**Supplementary Figure 2. Morphological and viability characterization of stromal cell lines in 2D and 3D cultures. (a–c) Live Cell Percentage.** Percentage of live cells for (a)NOF, (b) CAF and HUVEC (c) comparing 2D monolayer (green circles) and 3D matrix-based models (red circles) . Data are expressed as percentage relative to 0 Gy controls across the dose range (0–25.8 Gy). Error bars represent mean  $\pm$ SD.

**(d–f) Live Cell Size.** Analysis of cell dimensions ( $\mu\text{m}$ ) for , NOF (d), CAF (e), and HUVEC (f) in 2D (green circles) and 3D cultures (red circles) . Error bars represent mean  $\pm$ SD.

**(g) 2D Representative Morphology.** Representative bright-field microscopy images of NHDF, NOF, CAF, and HUVEC 2D monolayers at neutron doses of 0, 2.5, 5.3, 13.2, and 25.8 Gy .
